1 **Running Title:** West Nile virus in crocodiles and mosquitoes in Zimbabwe

2 **Keywords:** *Crocodylus niloticus*; mosquitoes; *Flaviviridae*; West Nile virus; Zimbabwe;

3 arboviruses; crocodiles; vector-borne infections; viruses; zoonoses.

4

5 **West Nile virus in crocodiles and mosquitoes in Zimbabwe**

6 **Authors:** Marlène Roy, Fortunate Mufunda, Deirdre Slawski, Charmaine Mutswiri, Irene

7 Mvere, Katherine Slawski, Pamela Kelly, Ilaria Piras, Annemarie Bezuidenhout, Tapiwanashe

8 Hanyire, Bryan Markey, Gerald Barry

9 **Author Affiliations:**

10 University College of Dublin, Dublin, Ireland. (M. Roy, K. Slawski, P. Kelly, I. Piras, B.

11 Markey, G. Barry)

12 Padenga Holdings Limited, Kariba, Zimbabwe (F. Mufunda, D. Slawski, C. Mutswiri, I. Mvere,

13 Annemarie Bezuidenhout)

14 Ministry of Lands, Agriculture, Fisheries, Water and Rural Resettlement, Harare, Zimbabwe (T.

15 Hanyire)

16 **Abstract—50 words**

17 We detected, for the first time, West Nile virus lineages 1 and 2 in Zimbabwe in

18 mosquitoes and crocodile tissue samples, including fluid from egg waste. Our results provide

19 evidence of WNV circulation in Zimbabwe, suggesting that an evaluation of the risk to humans

20 and susceptible animals should be considered.

21 **Text— 799 words**

22 The flavivirus, West Nile virus (WNV), is spread primarily by *Culex* mosquitoes among  
23 birds and many spillover hosts, including humans, horses and crocodiles (1)

24 There are 9 lineages of WNV, but lineages 1 and 2 are the most commonly associated  
25 with human outbreaks of disease (1). Lineage 1 is typically found in Europe, Africa, Asia, the  
26 Americas and Australia. Lineage 2 strains are found in Africa and Europe (2). While WNV is an  
27 arbovirus, a number of studies have highlighted the potential for both mosquito and water-borne  
28 transmission (3,4)

29 There is a paucity of information on the viruses that may be present in Northern  
30 Zimbabwe. In collaboration with a Nile crocodile (*Crocodylus niloticus*) farm we collected post-  
31 mortem tissue samples including skin, blood, kidney, brain, lung and liver from crocodiles that  
32 had been culled as part of routine farming practices, along with fluid from egg waste. All  
33 samples were collected with the approval of the UCD Animal Research Ethics Committee; no  
34 procedures were conducted on living animals and no animal was euthanized for the sole purposes  
35 of the study. Pooled samples of mosquitoes and midges caught on and off farm were also  
36 collected, using light traps. The traps contained mosquitoes including members of the genera  
37 *Anopheles*, *Aedes* and *Culex* as well as midges belonging to the *Chironomidae*, *Cecidomyiidae*  
38 and *Ceratopogonidae* families.

39 Total RNA was extracted from 16 insect pools (6 mosquito and midge mixed pools, 8  
40 mosquito only pools, 2 midge only pools) and 180 crocodile tissue samples by a Trizol (Thermo  
41 Fisher Scientific) method according to the manufacturer's instructions. Reverse transcription  
42 (RT) was performed using SuperScript III Master Mix (Thermo Fisher Scientific) and PCR was

43 performed using the 5x HOT FIREPol SolisGreen PCR Mix (Solis BioDyne). The cDNA was  
44 checked using the housekeeping gene 18S ribosomal RNA (5' AGG ATC CAT TGG AGG GCA  
45 AGT 3' and 5' TCC AAC TAC GAG CTT TTT AAC TGC A 3') (5) followed by PCR screens  
46 using the pan-flavivirus primer set: Flav-fAAR 5' TAC AAC ATG ATG GGA AAG AGA GAG  
47 AAR AA 3' and PFlavrKR 5' GTG TCC CAK CCR GCT GTG TCA TC 3' (6). A 265 bp DNA  
48 fragment of the NS5 gene was amplified from mosquito only, mosquito/midge and crocodile  
49 tissue pools but not from midge only pools. Virus replication was confirmed in select insect and  
50 crocodile samples through RT reactions using the pan-flavivirus primer sets in both sense and  
51 antisense orientations, followed by end-point PCR.

52 A selection of pan-flavivirus positive samples were then tested specifically for the presence of  
53 WNV RNA using primers targeting the WNV capsid gene (130 bp fragment; 5'  
54 GCCGGGCTGTCAATATGCTAAAA 3' (7) and 5' AAGAACGCCAAGAGAGCCAAC 3'  
55 (8)). All 31 pan-flavivirus positive samples tested were positive for WNV.

56 Further confirmation was provided by lineage specific PCR on 22 of these 31 samples. A WNV  
57 lineage 1 primer set: 5' TGCCTAGTGTCAAGATGGGG 3' and 5'  
58 ACTCTCCGGCTGTCAATCA 3', was designed (reference sequence NC\_009942.1) to  
59 amplify a 200 bp fragment of the NS3 gene while a WNV lineage 2 (NC\_001563.2) primer set:  
60 5' AACTGATCATGAAGGACGGC 3' and 5' ACATCTGCGCGTATGACTTC 3', was  
61 designed to amplify a 141 bp fragment of the RNA polymerase.

62 Of the 22 samples tested, 8 were positive for lineage 1 and lineage 2, 2 were positive for  
63 lineage 1 only while 12 were positive for lineage 2 only. Sanger sequencing was carried out on  
64 the positive PCR results (Table 1). Unfortunately, the quality of samples was not sufficient in

65 several cases leading to sequences that were not usable. BLAST analysis of the good quality  
66 sequences revealed that three mosquito/midge pools, a crocodile egg waste fluid pool and two  
67 crocodile lung/liver samples showed high similarity (at least 92%) to sequences from WNV  
68 lineage 2 isolates including, in 2 cases, WNV strain B956 (GenBank accession no. AY532665),  
69 the first WNV strain identified from a human patient in Uganda in 1937 (9). Two insect samples  
70 also gave a very short sequence matching WNV lineage 1.

71 To the best of our knowledge, no studies in Zimbabwe have reported the presence of  
72 WNV in crocodiles, insects or humans. WNV has been detected in birds (barn swallow and  
73 brown-throated martin) by RT-PCR in central Zimbabwe (10). We report here the detection of  
74 WNV RNA for the first time in northern Zimbabwe in mosquitoes and crocodile samples,  
75 highlighting the possibility of local transmission. Our results suggest that WNV transmission  
76 among crocodiles may involve vector-borne infections, but other transmission routes could also  
77 be important. In particular, the finding of WNV RNA in fluid from egg waste suggests the  
78 possibility of vertical transmission. This requires further investigation as it could have significant  
79 implications for the prevention of WNV introduction into farms and zoos. This report highlights  
80 potential veterinary and human health concerns and improved surveillance of this and other  
81 potential pathogens in the area is warranted.

## 82 **Acknowledgments**

83 The support of Gary Sharp, Chief Executive Officer of Padenga Holdings Limited is  
84 gratefully acknowledged. This research was approved by the Research Council of Zimbabwe.  
85 This work was supported financially by Padenga Holdings Limited.

86

## 87 **Author Bio**

88 Dr. Roy is a post-doctoral researcher working in the research group of Dr. Barry, at the  
89 School of Veterinary Medicine, University College Dublin, Ireland. Her research interests  
90 include the molecular study of arboviral diseases and virus-host interactions.

91 **Address for correspondence:** Gerald Barry, Veterinary Biosciences, School of Veterinary  
92 Medicine, University College Dublin, Belfield, Dublin 4, Ireland. E-mail: [gerald.barry@ucd.ie](mailto:gerald.barry@ucd.ie)

## 93 **References**

- 94 1. Habarugira G, Suen WW, Hobson-Peters J, Hall RA, Bielefeldt-Ohmann H. West Nile  
95 virus: An update on pathobiology, epidemiology, diagnostics, control and “One health”  
96 implications [Internet]. Vol. 9, Pathogens. MDPI AG; 2020 [cited 2021 Feb 16]. p. 1–51.  
97 Available from: <https://pubmed.ncbi.nlm.nih.gov/32707644/>
- 98 2. David S, Abraham AM. Epidemiological and clinical aspects on West Nile virus, a  
99 globally emerging pathogen. Infectious Diseases [Internet]. 2016 Aug 2 [cited 2021 Feb  
100 16];48(8):571–86. Available from:  
101 <https://www.tandfonline.com/doi/full/10.3109/23744235.2016.1164890>
- 102 3. Lund M, Shearn-Bochsler V, Dusek RJ, Shivers J, Hofmeister E. Potential for waterborne  
103 and invertebrate transmission of West Nile virus in the Great Salt Lake, Utah. Applied and  
104 Environmental Microbiology. 2017 Jul 1;83(14).
- 105 4. Habarugira G, Moran J, Colmant AMG, Davis SS, O’Brien CA, Hall-Mendelin S, et al.  
106 Mosquito-independent transmission of West Nile virus in Farmed Saltwater Crocodiles  
107 (*Crocodylus porosus*). Viruses. 2020;12(2).
- 108 5. Ángel Pavón M, González I, Pegels N, Martín R, García T. PCR detection and  
109 identification of *Alternaria* species-groups in processed foods based on the genetic marker  
110 Alt a 1. Food Control. 2010 Dec 1;21(12 SUPPL.):1745–56.
- 111 6. Vina-Rodriguez A, Sachse K, Ziegler U, Chaintoutis SC, Keller M, Groschup MH, et al.  
112 A Novel Pan-Flavivirus Detection and Identification Assay Based on RT-qPCR and  
113 Microarray. BioMed Research International [Internet]. 2017 [cited 2021 Feb 16];2017.  
114 Available from: <https://pubmed.ncbi.nlm.nih.gov/28626758/>

- 115 7. Vinayagamorthy T, Mulatz K, Drebot M, Hodkinson R. Molecular typing of West Nile  
116 Virus, Dengue and St. Louis encephalitis using multiplex sequencing. *Journal of*  
117 *Molecular Diagnostics*. 2005;7(2):152–9.
- 118 8. Li-Jun S, Mao-Min L, Gang L, Cheng-Yao L, Jin-Gang Z. Establishment and evaluation  
119 of real-time PCR for West Nile virus detection. *Chinese Journal of Agricultural*  
120 *Biotechnology*. 2009 Apr;6(1):55–9.
- 121 9. Smithburn KC, Hughes TP, Burke AW, Paul JH. A Neurotropic Virus Isolated from the  
122 Blood of a Native of Uganda 1. *The American Journal of Tropical Medicine and Hygiene*.  
123 1940 Jul 1;s1-20(4):471–92.
- 124 10. Caron A, Chiweshe N, Mundava J, Abolnik C, Capobianco Dondona A, Scacchia M, et  
125 al. Avian Viral Pathogens in Swallows, Zimbabwe: Infectious Diseases in Hirundinidae:  
126 A Risk to Swallow? *EcoHealth*. 2017 Dec 1;14(4):805–9.

127

128

129

130

131

132

133

134

135

136

137

138 **Table**

139 WNV sequences from insect and crocodile tissue samples\*.

| Samples                        | Sanger Sequences                   | Blast Identification                                    | Blast identities |
|--------------------------------|------------------------------------|---------------------------------------------------------|------------------|
| <b>Mosquito and midge pool</b> | cCaTCTGGTtnnaTGTGGCTGGGGGCCCGC     | West Nile virus, Lineage 2,<br>Sequence ID: NC_001563.2 | 197/203 (97%)    |
|                                | TTCCTGGAGTTTGAAGCTCTCGGATTCCT      |                                                         |                  |
|                                | CAATGAAGACCACTGGCTGGGTAGGAAG       |                                                         |                  |
|                                | AACTCAGGAGGAGGAGTTGAAGGCTTAG       |                                                         |                  |
|                                | GACTGCAGAAGCTCGGGTACATCTTGAA       |                                                         |                  |
|                                | GGAAGTTGGAACAAAGCCTGGAGGAAA        |                                                         |                  |
|                                | GGTTTACGCTGATGACACAgccggaTGGG      |                                                         |                  |
| Acac                           |                                    |                                                         |                  |
| <b>Mosquito and midge pool</b> | AgngncTGGgggCCCCTTCCTGgagtTtGaan   | West Nile virus, Lineage 2,<br>Sequence ID: NC_001563.2 | (175/184) 95%    |
|                                | ctcnannATTCTCAATGAAGACCACTGGC      |                                                         |                  |
|                                | TGGGTAGGAAGAACTCAGGAGGAGGAG        |                                                         |                  |
|                                | TTGAAGGCTTAGGACTGCAGaAGCTCGG       |                                                         |                  |
|                                | GTACATCTTGAAGGAAGTTGGAACAAAG       |                                                         |                  |
|                                | CCTGGAGGAAAGGTTTACGCTGAtgAcac      |                                                         |                  |
| agcnGgaTGGGaca                 |                                    |                                                         |                  |
| <b>Mosquito and midge pool</b> | tTCcTCaaTGAacACCaCTGgcTGGgTaggaan  | West Nile virus, lineage 2,<br>Sequence ID: NC_001563.2 | (121/131) 92%    |
|                                | AaCTCnnGAgGAGGAgTTGAAGGCTTAggac    |                                                         |                  |
|                                | TGCgnantCTCgggtaCnTCTTgaagGAatTTGG |                                                         |                  |
|                                | AaCaaagCCTGgAgGAaaGGTTTAcgCTGATG   |                                                         |                  |
|                                | ACac                               |                                                         |                  |
| <b>Mosquito and midge pool</b> | anTTTTTACCTGTGGTCATGAGAGCCTTAG     | West Nile virus, lineage 1,<br>Sequence ID: NC_009942.1 | (21/22) 95%      |
|                                | AGCTACAGATTTTTTTCaAGCTTTTCCGTCC    |                                                         |                  |
|                                | TGACTCACAAAGAAATGAATAAATTTGGT      |                                                         |                  |
|                                | GTTGGAGGTCTGGGACTTCATGATTTGGG      |                                                         |                  |
|                                | ACAACGAATCAAATTAGCTTGGAGAGGA       |                                                         |                  |
|                                | GCCGCCATAAGTGATGACACAgccggctG      |                                                         |                  |
| Gga                            |                                    |                                                         |                  |
| <b>Mosquito pool</b>           | TTCnATGACaCagccggcTGgg             | West Nile virus, lineage 1,<br>Sequence ID: NC_009942.1 | 21/21 (100%)     |

|                                       | <b>acaCAnnnncnctnnngngnnnngt</b>                                                                                                                                                                                                                                        |                                                         |               |
|---------------------------------------|-------------------------------------------------------------------------------------------------------------------------------------------------------------------------------------------------------------------------------------------------------------------------|---------------------------------------------------------|---------------|
| <b>Fluid from crocodile egg waste</b> | tGgtntana <b>TGTGGCTGGGGCCCCGCTTCCT</b><br><b>GGAGTTTGAAGCTCTCGGATTCTCAATG</b><br><b>AAGACCACTGGCTGGGTAGGAAGAACTC</b><br><b>AGGAGGAGGAGTTGAAGGCTTAGGACTG</b><br><b>CAGAAGCTCGGGTACATCTTGAAGGAAG</b><br><b>TTGGAACAAAGCCTGGAGGAAAGTTTA</b><br><b>CGCTGATGACAC</b> Ancng  | West Nile virus, Lineage 2,<br>Sequence ID: NC_001563.2 | 177/177(100%) |
| <b>Adult crocodile lung and liver</b> | <b>GtggcTGGGGgCCCCGCTTCCTGGAgTTTGA</b><br><b>AgCTCTCGGATTCTCAATGAAGACCACT</b><br><b>GGCTGGGTAGGAAGAACTCAGGAGGAGG</b><br><b>AGTTGAAGGCTTAGGACTGCAGAAGCTC</b><br><b>GGGTACATCTTGAAGGAAGTTGGAACAAA</b><br><b>GCCTGGAGGAAAGGTTTACGCTGATGAC</b><br><b>ACAgccggaTGGGacaCA</b> | West Nile virus, Lineage 2,<br>Sequence ID: NC_001563.2 | 186/190 (98%) |
| <b>Adult crocodile lung and liver</b> | CGGACGGAAATTGCCATGCTGATCTGCGG<br>ACACATCATCTTTTTGGTGAAT <b>GTGACTG</b><br><b>GGGGCCCCGCTTCCTGGCCGTTTGAAGCT</b><br>CAAAAATTCCT                                                                                                                                           | West Nile virus, lineage 2,<br>Sequence ID: NC_001563.2 | 35/38 (92%)   |

140 \*Sanger sequencing was performed from purified PCR products using the pan-flavivirus forward  
141 primer (6).

142

143

144
